## **Title**

Whole-organism mapping of the genetics of gene expression at cellular resolution

## **Authors**

Eyal Ben-David<sup>1,2\*</sup>, James Boocock<sup>1</sup>, Longhua Guo<sup>1</sup>, Stefan Zdraljevic<sup>1</sup>, Joshua S. Bloom<sup>1\*</sup>,  
Leonid Kruglyak<sup>1\*</sup>

(\*) To whom correspondence should be addressed: [eyal.bendavid@mail.huji.ac.il](mailto:eyal.bendavid@mail.huji.ac.il),  
[jbloom@mednet.ucla.edu](mailto:jbloom@mednet.ucla.edu), [lkruglyak@mednet.ucla.edu](mailto:lkruglyak@mednet.ucla.edu)

## **Affiliations**

1. Department of Human Genetics, Department of Biological Chemistry, and Howard Hughes Medical Institute, University of California, Los Angeles, CA 90095, USA.
2. Department of Biochemistry and Molecular Biology, Institute for Medical Research Israel-Canada, The Hebrew University School of Medicine, Jerusalem, Israel

## Abstract

Genetic variants affecting gene expression, termed expression quantitative trait loci (eQTLs), underlie phenotypic variation in complex traits and disease risk<sup>1-3</sup>. Studies in purified blood cell populations<sup>4-6</sup> and computational analyses in human tissues<sup>7,8</sup> suggest that many eQTLs are cell-type specific. Single-cell RNA sequencing (scRNA-seq) has shown promise for eQTL mapping in blood cells and cell lines<sup>9-11</sup>. However, the complexity of mammalian tissues makes studying cell-type eQTLs with scRNA-seq highly challenging. Here, we report a novel approach in the model nematode *Caenorhabditis elegans* that uses scRNA-seq to map eQTLs at cellular resolution in a single one-pot experiment. We studied an extremely large population of hundreds of thousands of genetically distinct individuals and mapped both *cis* and *trans* eQTLs across the different cell types of *C. elegans*. We find cell-type-specific *trans*-eQTL hotspots and show that they affect the expression of core pathways in the relevant cell types. Finally, we find single-cell-specific eQTL effects in the nervous system, including an eQTL with opposite effects in two individual neurons. Our results show that eQTL effects can be specific down to the level of single cells.

## Main Text

### Cell-type-specific eQTL mapping in a single one-pot experiment

Genome-wide eQTL mapping involves acquiring genotypes and gene expression profiles for a genetically diverse cohort. We recently developed a method, *C. elegans* extreme quantitative trait locus (ceX-QTL) mapping, for genetic analysis of complex traits in extremely large populations of segregants<sup>12</sup>. The method takes advantage of a mutation in the gene *fog-2* that forces the normally hermaphroditic *C. elegans* to reproduce via obligate outcrossing, allowing us to propagate a large crossing experiment for multiple generations.

Here we build on ceX-QTL by combining it with single-cell RNA sequencing (scRNA-seq) to carry out eQTL mapping at cellular resolution in a single one-pot experiment (Fig 1A). In this approach, a large heterogeneous pool of cells from thousands of genetically distinct individuals is profiled using scRNA-seq, cell types are inferred by clustering scRNA-seq profiles and studying known cell-type markers, and genotype information is reconstructed using expressed genetic variants, enabling eQTL mapping in multiple cell types simultaneously. *C. elegans* has an invariant cell lineage that leads to each individual having the same number of cells, with cell types defined down to cellular resolution<sup>13</sup>, making this organism exceptionally well-suited for this study.

We propagated a cross between the laboratory strain N2 and a highly divergent isolate from Hawaii, CB4856, for four generations, generating a pool of 200,000 genetically distinct F4 segregants. We dissociated the segregant pool to single cells at the L2 larval stage and profiled the cells with scRNA-seq. We identified clusters in a Uniform Manifold Approximation and Projection (UMAP) of the dataset<sup>14-16</sup>, and determined their cell-type identities using known markers<sup>17,18</sup>. Our final dataset comprises 55,508 cells classified into 19 different cell types (Fig

1B) (Table S1). The observed number of cells of each type was strongly correlated with the known cell-type abundance in L2 larvae (Spearman's  $\rho = 0.87$ ,  $p = 2.2 \times 10^{-6}$ , Fig S1).

Most of the cells in our sample were expected to carry unique genotypes (materials and Methods). This design is advantageous for eQTL mapping because it maximizes the sample size<sup>19</sup>, but requires *de novo* genotype calling, since the genotype of each cell is unknown beforehand. Rather than assign deterministic genotype calls based on sparse scRNA-seq data, we derived genotype probabilities for each cell using a Hidden Markov Model (HMM) (Fig S2). We then performed eQTL mapping with these genotype probabilities in a negative binomial modeling framework (Materials and Methods).

### **eQTL mapping in multiple cell types**

We mapped 1,718 *cis* eQTLs in 1,294 genes, and 451 *trans* eQTLs in 390 genes, at a false discovery rate (FDR) of 10% across the different cell types (Fig 2A-B, Table S2). The number of eQTLs detected in each cell type was strongly correlated with the number of cells of that type (Spearman's  $\rho = 0.91$ ,  $p < 2.2 \times 10^{-16}$ ). In cell types with >1000 cells, we mapped between 52 and 415 eQTLs (Table S1). For 1,071 of the 1,294 genes with a *cis* eQTL (83%), the eQTL was detected in only one cell type. For 208 of the remaining 223 genes (93%), the direction of the eQTL effect was the same in all cell types in which it was detected.

We studied to what degree our *cis* eQTL results were concordant with gene expression differences between the parents. We generated a scRNA-seq dataset from 6,721 N2 and 3,104 CB4856 cells, and used a classifier trained on the segregant dataset to identify cell types in the parental scRNA-seq dataset. We then carried out a differential expression analysis in each cell type. We found 870 differentially expressed genes (at a >2 fold change and FDR of 10%), of

which 201 (23%) had a *cis* eQTL in the same tissue (OR = 18.8,  $p < 2.2 \times 10^{-16}$ , Fisher's Exact Test). 191 of these *cis* eQTL (95%) showed the same direction of effect as the parental difference. Further, the effect sizes of the significant *cis* eQTLs were strongly correlated with the sizes of the parental differences (Spearman's  $\rho = 0.66$ ,  $p < 2.2 \times 10^{-16}$ ) (Fig S3-4). These results provide independent support for our *cis*-eQTL mapping, and show that for a sizable fraction of the genes, those *cis* eQTLs are a major cause of differential gene expression between the strains.

### **Comparison between bulk and single-cell *cis*-eQTL mapping**

To investigate the relationship between single-cell and bulk eQTL mapping, we compared our single-cell eQTLs to those previously identified in a panel of 200 recombinant inbred lines (RILs) generated from crossing N2 and CB4856<sup>20</sup>. In the bulk study, a large population of whole worms from each RIL was recovered at a late larval stage, L4, and profiled on expression microarrays. We reanalyzed data for 11,535 genes expressed in both datasets and identified 981 *cis* eQTLs in the bulk dataset (at an FDR cutoff of 10%). Despite major differences in experimental design, including the developmental stage of the worms, the overlap with the single-cell *cis* eQTLs was highly significant, with 335 *cis* eQTLs shared between the studies (Odds Ratio = 7.2,  $p < 2.2 \times 10^{-16}$ , Fisher's exact test) (Fig. 2C). These shared loci represented 34% of the bulk *cis* eQTLs and 32% of the single-cell *cis* eQTLs. Furthermore, the bulk and single-cell eQTL effect sizes were highly correlated (Spearman's  $\rho = 0.64$ ,  $p < 2.2 \times 10^{-16}$ ) (Fig 2D). Lastly, single-cell eQTLs detected in multiple cell types were more likely to also be seen in the bulk study: 50% of the genes with *cis* eQTLs detected in multiple cell types were also identified in bulk, compared to 28% of the eQTLs detected in only one cell type (OR = 2.58,  $p = 2.1 \times 10^{-8}$ ) (Fig. 2C). This

observation suggests that the single-cell eQTL mapping approach improves the power to detect cell-type specific effects.

### **Shared and cell-type specific *trans*-eQTL hotspots**

We observed that 90 of the 451 *trans* eQTLs clustered at 5 hotspots, each containing 12-31 eQTLs (Fig. S5, Table S3). A hotspot on Chr I was identified independently in both neurons and seam cells; the top associated variant (Chr. I:10890182) was the same for both cell types (Fig. S5A-B). The other hotspots were identified in the body wall muscle (on Chr. I) (Fig. S5C), the intestine (on Chr. V) (Fig. S5D), and neurons (two distinct hotspots on Chr. III) (Fig. S5B).

To test whether the target genes of these 5 hotspots are involved in coherent biological processes, we relaxed the FDR threshold to 20%, which increased the number of genes linked to each hotspot to 21-42, and performed Gene Ontology (GO) enrichment analysis (Table S4). For three of the hotspots, we found significant enrichments that were consistent with the cell-type specificity of the hotspot. The targets of the hotspot detected in intestinal cells were weakly enriched for genes involved in the innate immune response (FDR-corrected  $p = 0.042$ ), a major role of that tissue<sup>21</sup>. The targets of the hotspot detected in the body wall muscle were enriched for genes associated with the term *myofilament* (FDR corrected  $p = 6.4 \times 10^{-8}$ ), *actin cytoskeleton* (FDR-corrected  $p = 4.2 \times 10^{-6}$ ), and related terms. The enrichment was driven by the genes *mup-2*, *tnt-1*, *tnt-2*, *mlc-2*, *mlc-3*, *lev-11* and *act-4*. *mlc-2* and *mlc-3* encode a myosin light chain, and *act-4* encodes an actin protein. *lev-11* encodes a tropomyosin, and *mup-2*, *tnt-1*, and *tnt-2* encode 3 of the 4 proteins in *C. elegans* that are expressed in the body-wall muscle and form troponin complexes, highly conserved regulators of muscle contraction<sup>22</sup> (Fig S6).

The targets of the neuronal hotspot on the right arm of Chr III were enriched for genes involved in *vesicle localization* (FDR-corrected  $p = 7.5 \times 10^{-3}$ ), as well as for BMP receptor binding genes (FDR-corrected  $p = 2.8 \times 10^{-3}$ ). The latter enrichment was driven by *dbl-1* and *tig-2*, orthologs of human bone morphogenetic protein (BMP) genes BMP5 and BMP8 and ligands of the transforming growth factor beta (TGF- $\beta$ ) pathway<sup>23</sup>. Notably, *dbl-1* was discovered as a gene that regulates body size in *C. elegans*<sup>24</sup>, the hotspot peak marker is located <300 kb from the peak of a QTL we previously identified for body size<sup>25</sup>, and the corresponding confidence intervals overlap (Table S3), suggesting that differential regulation of the TGF- $\beta$  pathway is involved in variation in body size between N2 and CB4856.

### **Cell-specific eQTL effects in the *C. elegans* nervous system**

*C. elegans* is a premier model for studying neurobiology at the cellular level, which is aided by its invariant cell lineage and the diverse functions associated with specific individual neurons. Importantly, many of the neurons are highly variable in their gene expression, and express specific gene markers<sup>26</sup>. To identify specific subtypes of neuronal cells, we separately clustered the 12,467 cells identified as neurons and compared the clusters to previous *C. elegans* scRNA-seq datasets, including the recently published *C. elegans* Neuronal Gene Expression Map & Network (CeNGEN)<sup>17,18,27,28</sup> (Table S5). The neurons fell into 81 distinct clusters, ranging from 17 to 872 cells. We mapped these clusters onto 100 (83%) of the 120 neuronal clusters identified in CeNGEN (Fig S7). We also identified CEM neurons, which are male specific and absent from CeNGEN, based on the expression of the marker *cwp-1*<sup>29</sup>.

We mapped *cis* eQTLs in each of the single neuronal subtypes (sn-eQTLs) and identified a total of 163 sn-eQTLs in 132 genes at an FDR of 10% (Fig 3A, Table S6). Of these, 117 (88%)

were identified in only a single neuronal subtype. Functional annotation of sn-eQTLs identified 25 genes involved in signaling (FDR-corrected  $p = 0.047$ ), including 12 genes involved in G-protein Coupled Receptor (GPCR) signaling (FDR-corrected  $p = 0.047$ ) and 8 genes involved in neuropeptide signaling (FDR-corrected  $p = 9.9 \times 10^{-3}$ ).

We compared the sn-eQTLs to those identified when all neurons were analyzed jointly (“pan-neuronal mapping”), and found that a sizable fraction of the sn-eQTLs did not have evidence for a pan-neuronal signal: 92 were not identified pan-neuronally at an FDR of 10%, and 69 were not identified even at a highly permissive FDR of 50%, suggesting that they exert their effects only in specific neuronal subtypes (Fig 3A). Regardless of statistical significance, pan-neuronal eQTLs should have consistent effect directions across neuronal subtypes, while subtype-specific eQTLs should not. We therefore compared the direction of effect of each sn-eQTL in the subtype in which it was detected with its direction of effect in the set of all neurons excluding that subtype. Among the 69 sn-eQTLs with no signal in the pan-neuronal mapping even at the permissive FDR, the direction of the effect was concordant for 33 and discordant for 36, not significantly different from chance ( $p > 0.5$ ; binomial test), as would be expected if these effects are truly subtype-specific (Fig 3B). In contrast, among the 94 that had a pan-neuronal signal at an FDR of 50%, the direction of the effect was concordant for 88 and discordant for only 6 ( $p < 0.000001$ ; binomial test), consistent with differences in detection arising from limited statistical power.

In a striking case, we observed an sn-eQTL in the neuropeptide gene *nlp-21* that showed significant and opposing effects in two neurons (Fig. 3C-D). In the RIC neuron, higher *nlp-21* expression was associated with the CB4856 allele ( $\beta = 4.4$ , FDR-corrected  $p = 0.03$ ), while in the RIM neuron, higher *nlp-21* expression was associated with the N2 allele ( $\beta = -5.4$ , FDR-



corrected  $p = 9.8 \times 10^{-7}$ ). In the pan-neuronal mapping, no significant effect is observed for this gene. We identified the RIC and RIM neurons in the parental dataset, and although the small number of cells in each group (35 and 27, respectively, with only 9 and 5 of them from CB4856) was insufficient for statistical testing, the directions of the differences agreed with the eQTL effects (Fig 3E). These results provide direct evidence that eQTLs can be specific down to the cellular level.

## Discussion

We used scRNA-seq to map eQTLs in *C. elegans* across cell types in a single one-pot experiment. Earlier scRNA-seq eQTL mapping studies were limited in sample size to at most ~100 individuals, but nevertheless highlighted the potential of this approach to identify cell-type<sup>9</sup> and developmental<sup>11</sup> eQTLs, as well as loci affecting expression variance<sup>10</sup>. Our novel approach allowed us to map eQTLs in tens of thousands of genotypically distinct individuals and enabled detection of both *cis* and *trans* eQTLs, as well as resolution of their effects down to the level of specific cells.

One of the major factors affecting gene expression studies is variation resulting from uncontrolled environmental differences between individuals that are grown or processed separately. By using scRNA-seq, we were able to process all individuals jointly. After the initial parental cross, all subsequent steps carried out over the course of five *C. elegans* life-cycles (three weeks) were performed in bulk, limiting any confounding environmental factors. To minimize the influence of genotype on development, we synchronized the worms at the first larval stage, L1, and collected samples at the L2 stage, limiting the time for differences to accumulate post-synchronization. Even careful synchronization is not expected to completely

remove the effects of genetic variation on developmental timing, and such variation can be combined with gene expression time course data collected during development to increase the power of eQTL mapping and to study the developmental dynamics of eQTLs<sup>30</sup>. This raises the possibility that future scRNA-seq studies of *C. elegans* across developmental stages would open the door to a similar analysis of our single-cell eQTL dataset.

Previous work suggested the existence of cell-type specific eQTL hotspots in *C. elegans* based on the expression patterns of hotspot targets<sup>30</sup>. We discovered three hotspots that are cell-type specific, with targets that are involved in core functions performed by these cell types. Recently, eQTL hotspots have been identified in human blood cells<sup>31,32</sup>, as well as in cell lines<sup>33</sup>. These results suggest hotspot and *trans* eQTL discovery is facilitated by expression studies that can distinguish cell types and point to a larger role of hotspots in the genetics of gene expression in animals.

A comparison of the single-cell *cis* eQTLs to those mapped in a previous whole-worm eQTL study from our laboratory showed a highly significant overlap despite major differences in experimental design. These results join accumulating evidence that *cis* eQTLs have robust, consistent effects<sup>34,35</sup>, and show that many of the effects are conserved across worm development. The strong overlap of *cis* eQTLs mapped by scRNA-seq and by whole-worm analysis also suggests that the effect of many *cis* eQTLs is conserved across cell types. By generating an extremely large number of unique segregants, our method enables scaling up the number of studied individuals simply by sequencing a larger number of cells. Thus, the increasing throughput of single-cell technologies and sequencing platforms will enable future work to study cell-type specificity of *cis* and *trans* eQTLs in greater detail.

Lastly, we discovered *cis* eQTLs that act in single subtypes of *C. elegans* neurons, including many that were not found when all neurons were analyzed jointly. Importantly, we also discovered an eQTL that influences expression of the gene *nlp-21* in opposing directions in two different neurons. These results show that despite the overall pattern of conservation, *cis* eQTL effects can be specific down to the level of single cells. Studying the genetics of gene expression across all levels, from bulk tissues to specialized cell types, is therefore crucial for a comprehensive understanding of regulatory variation—distinct genetic effects can be found at every step.

### **Acknowledgments**

The work was supported by the Howard Hughes Medical Institute and NIH grants R01 HG004321 (L.K.) and K99 HG010369 (E.B-D). Figure 1A was created with Biorender.com. We thank Michael Mashock, Marco De Simone, and other members of the Technology Center for Genomics & Bioinformatics (TCGB) at UCLA for preparing and sequencing 10x 3' chromium single-cell libraries. Code for the HMM and eQTL mapping can be found at [https://github.com/joshsbloom/single\\_cell\\_eQTL](https://github.com/joshsbloom/single_cell_eQTL).

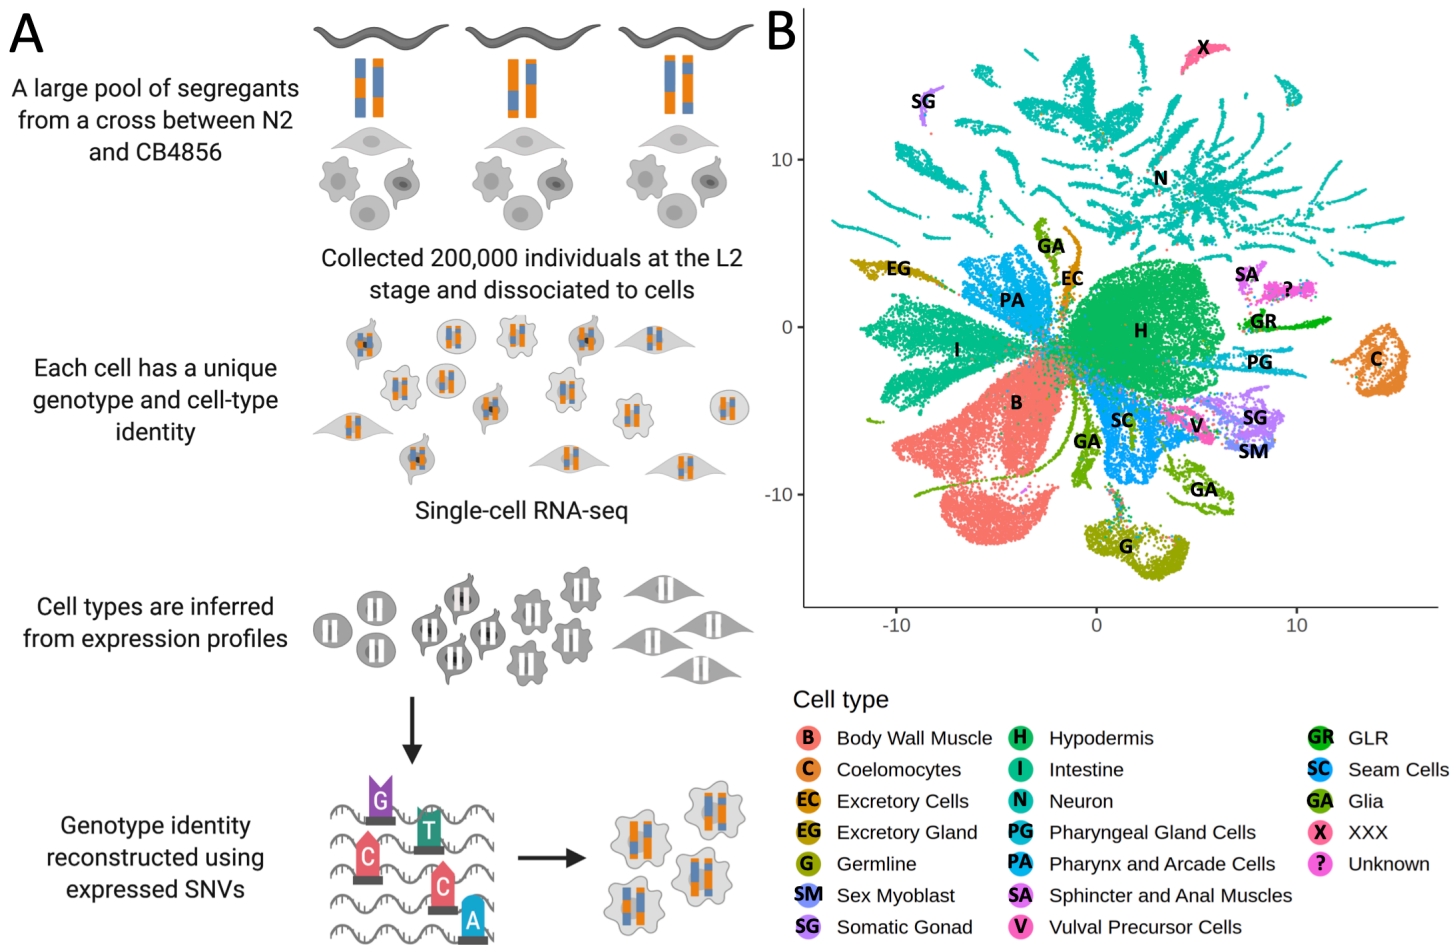

**Figure 1. Whole-organism eQTL mapping with single-cell RNA-sequencing (scRNA-seq).** (A) A large population of segregants is dissociated to single cells. Each cell in the suspension has an unknown genotype and cell-type identity. The suspension is profiled using scRNA-seq. Cell-type identity is inferred by clustering cells and comparing the expression of known marker genes. Genotypes are reconstructed from expressed single-nucleotide variants (SNVs). (B) The UMAP projection of 55,508 scRNA-seq expression profiles from approximately 200,000 *C. elegans* F4 segregants collected at the L2 larval stage is shown. Cells are colored based on the inferred cell type.

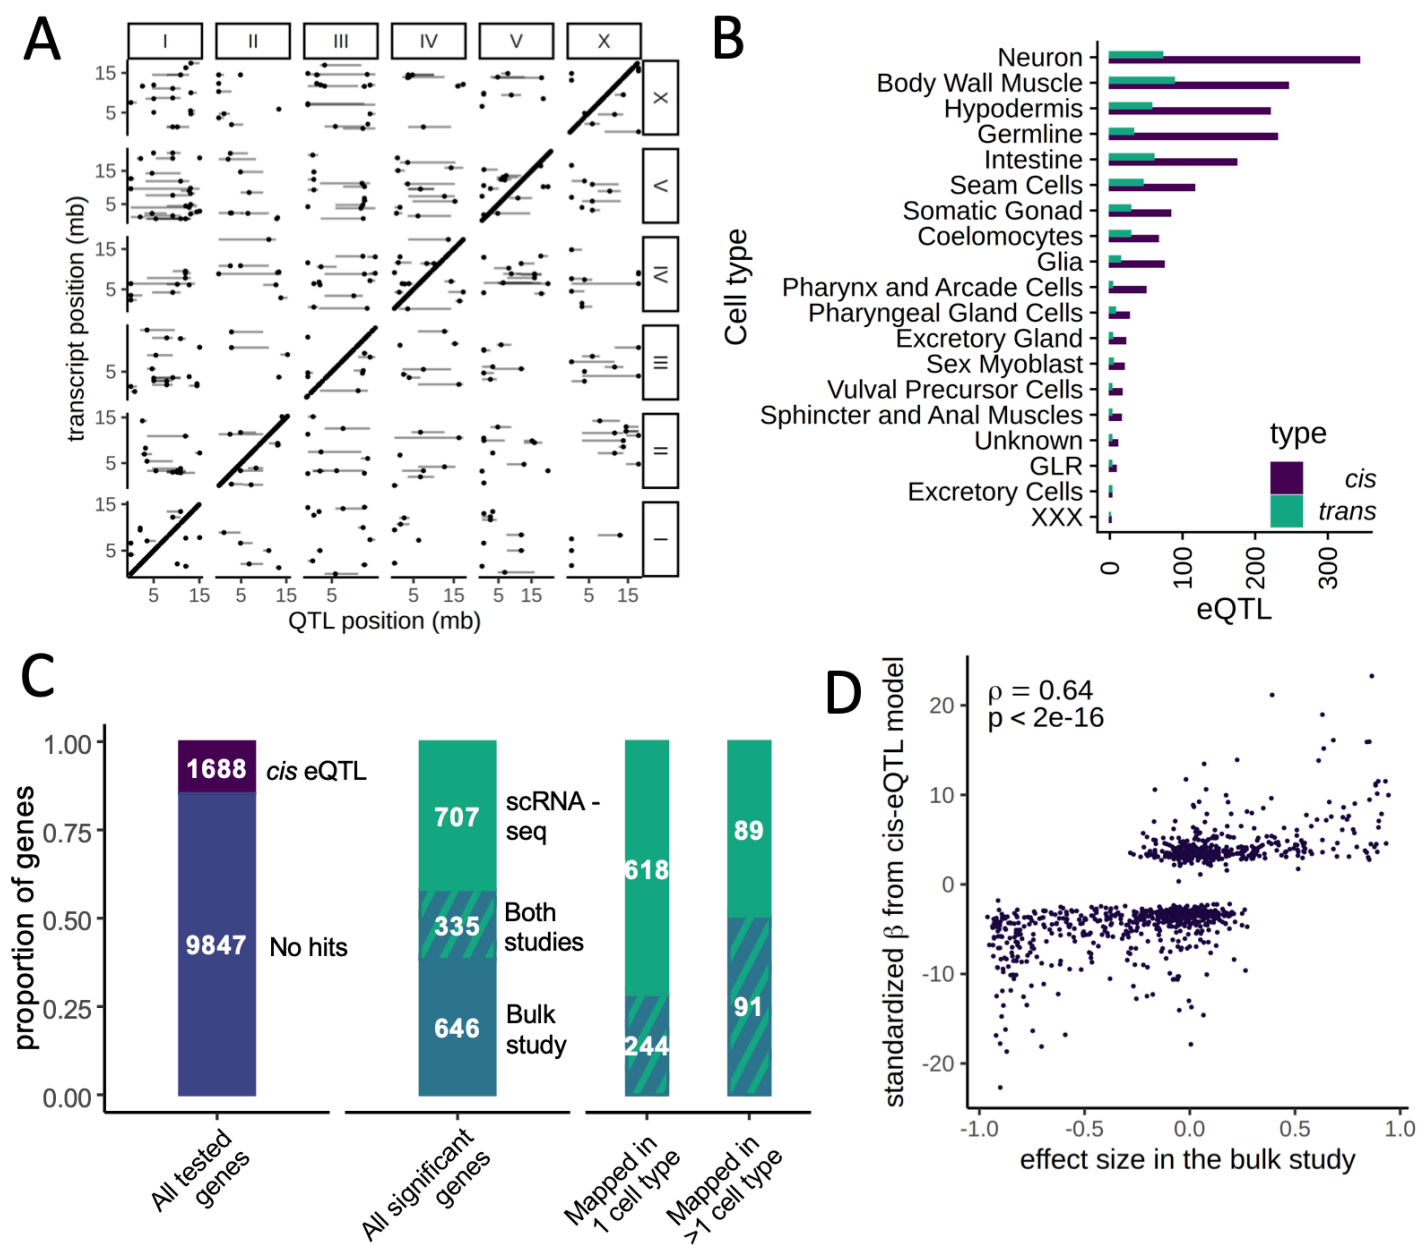

**Figure 2. eQTL mapping in cell types.** (A) A genome-wide map of eQTLs across all cell types is shown. The position of the eQTLs is shown on the x-axis, while the y-axis shows the position of the associated transcripts. Points along the diagonal are *cis* eQTLs (those mapping to nearby genes). (B) The number of *cis* and *trans* eQTLs mapped in each cell type. (C) The overlap between a previous study that mapped eQTLs in whole worms in a panel of recombinant inbred lines (RIL) and our dataset. (Left) The proportion of genes with a *cis* eQTL in at least one dataset, out of all genes tested. (Middle)

Of the 1,688 significant *cis*-eQTL genes, 355 had a *cis* eQTL in both datasets, representing a highly significant enrichment. (Right) Hits mapped in more than one cell type were more likely to also be found in the whole-worm (“bulk”) dataset. (D) Quantitative comparison between normalized effect sizes in our dataset and in the whole-worm dataset.

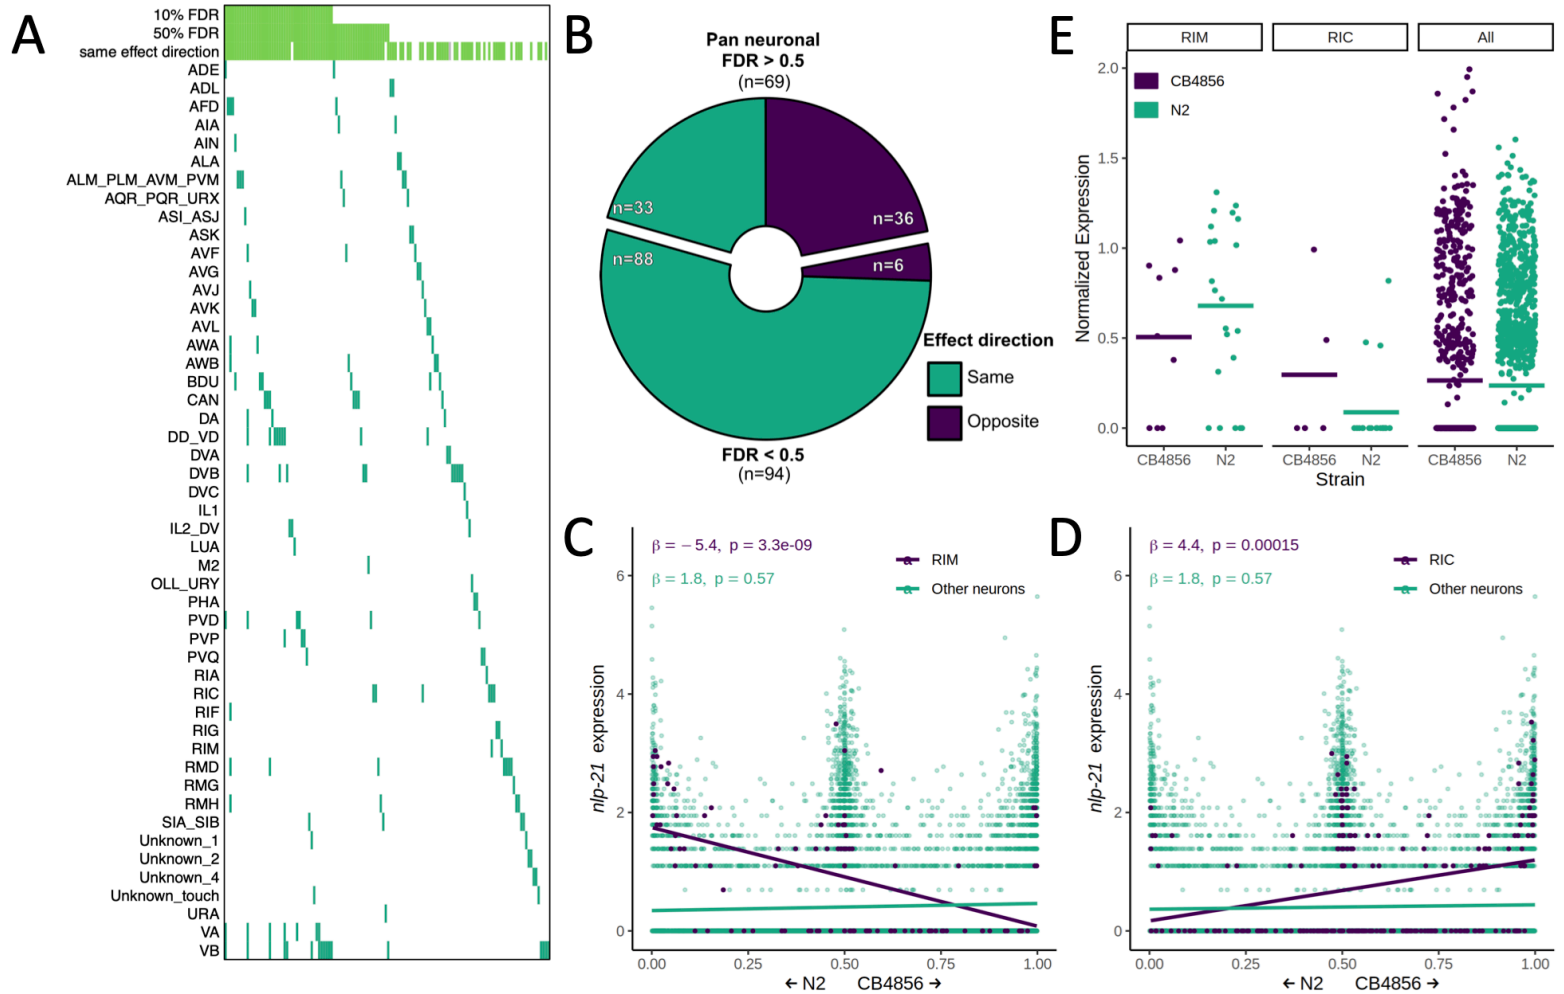

**Figure 3. Neuron-specific eQTL mapping.** (A) *cis*-eQTLs mapped in single neuronal subtypes (sn-eQTLs) are shown. The top three rows indicate whether the eQTL was mapped pan-neuronally at a 10% FDR threshold (row 1), at a 50% FDR threshold (row 2), and whether the sign of the effect estimate (“effect direction”) was the same in the pan-neuronal and single cell mapping (row 3). (B) Comparing the effect direction between the sn-eQTL mapping and mapping in a set of neurons excluding the sn-eQTL neuron shows evidence for subtype-specific effects. The number of genes showing the same (“purple”) or opposite (“turquoise”) effect directions is shown for genes with pan-neuronal FDR > 50% (top) and < 50% (bottom). (C-D) An eQTL with antagonistic effects in two

neurons. Higher expression of the gene *nlp-21* in the RIM neuron is associated with the N2 allele (C), while higher expression in the RIC neuron is associated with the CB4856 allele (D). In C and D, a linear fit is shown for illustration. All p values are FDR-corrected. Read counts were normalized to the number of UMIs in each cell and log-transformed. (E) Expression of *nlp-21* in the parental dataset. The direction of effect is concordant between the left panel and (C) (RIM neuron) and between the middle panel and (D) (RIC neuron). Horizontal lines are averages.



## Materials and Methods

### *C. elegans* culturing

*C. elegans* strains were cultured at 20°C using standard conditions with the exception that the agar in the nematode growth media (NGM) was replaced with a 4:6 mixture of agarose and agar (NGM+agarose), to prevent burrowing of the CB4856 strain. Parental strains used were QX2314 (N2 *fog-2(q71)* V; *hsp-90p::GFP II*) and PTM299 (CB4856 *fog-2(kah89)*). Large segregant panels were generated as before <sup>12</sup>. Briefly, 500 L4 males from PTM299 and 500 L4 hermaphrodites from QX2314 were seeded on a plate for 30 hours, and gravid worms and eggs were collected and bleached. Eggs were synchronized to L1 larvae for 24h, and seeded on 10cm NGM+agarose plates. In each generation, gravid worms were bleached, their progeny synchronized for 24h and seeded. The entire process was repeated up to F4, with 3-4 days per generation.

### Cell extraction and sequencing

192,000 F4 were seeded on four 10cm NGM+agarose plates seeded with OP50. L2 were recovered after 24 hours, and staging was validated under a stereomicroscope. L2 cell dissociation was carried out as previously described <sup>36</sup>, implementing modifications from a later study <sup>37</sup>, as well as our own. Worms were recovered off the plates and washed three times in M9. Lysis was then done with an SDS-DTT solution (200 mM DTT, 0.25% SDS, 20 mM HEPES, pH 8.0, 3% sucrose) in a hula mixer set on low speed to prevent worms from settling. The lysate was observed under the stereoscope every two minutes, and lysis was stopped when a blunted head shape appeared in the majority of worms <sup>37</sup>, after ~4 minutes. Worms were then washed quickly three times in 1ml of M9, and two additional times in 1ml of egg buffer (118 mM NaCl,

48 mM KCl, 2 mM CaCl<sub>2</sub>, 2 mM MgCl<sub>2</sub>, 25 mM HEPES, pH 7.3, osmolarity adjusted to 340 mOsm with sucrose). Worms were then resuspended in 0.5ml of 20mg/ml Pronase E that was freshly prepared in L15 media supplanted with 2% fetal bovine serum (L15-FBS) and adjusted to 340 mOsm with sucrose. Worm dissociation was done by continuous pipetting on the side of the tube, and monitored every 2-3 minutes on a microscope equipped with a 40x phase contrast objective lens. Dissociation was stopped when few intact worms remained and a high density of cells was visible. 0.5ml of L15-FBS was added to stop the reaction, and the lysate was spun for 6 minutes at 500g at 4°C. The cell pellet was resuspended in PBS (PBS was adjusted to 340 mOsm with sucrose). Cell suspension was spun for 1 minute in 100g at 4°C to remove remaining undigested worms, counted and diluted to 1M cells/ml in osmolarity adjusted PBS, and loaded directly onto 5 lanes of 3' Chromium single-cell RNA-sequencing flow cells (10x Genomics), targeting 10,000 cells on each lane. Library prep was carried out according to manufacturer's protocol. Prepared libraries were sequenced together on an S4 lane of Novaseq 6000. A paired-end 2x150 run was done, to maximize the recovery of single-nucleotide variants. In all downstream processing, each of the five 3' Chromium lanes processed concurrently was treated as a separate "batch", and lane identity corresponds to the "batch" identity for the rest of the methods.

### **Single-cell RNA-sequencing data processing**

Raw sequencing reads were analyzed using *Cell Ranger* (Ver 3.0.2). We used a gene transfer format (GTF) file that was corrected for misannotation of 3' untranslated regions (3'UTR) that was generated in a previous study<sup>18</sup>. *C. elegans* cell-types differ widely in the number of UMIs that are recovered using scRNA-seq. Therefore, a simple UMI cutoff, as is commonly used, may

be biased for cell-types with more UMIs. We therefore implemented an iterative pipeline to recover clusters of *bona fide* cells and remove cell doublets as well as degraded cells. We took 20,000 cells with the most UMIs in each cluster (twice the targeted number of cells, 100,000 overall), and processed them in *Monocle* (Ver 3) <sup>38</sup>. Default parameters were used, with the exception that 100 dimensions were used for reduction, and batch was added as a covariate. Leiden clustering identified a total of 154 clusters, and we used the *top\_markers* function in *Monocle* to identify the genes upregulated in each. We then removed clusters whose top genes included any ribosomal genes or the mitochondrial genes *ndfl-4*, *nduo-6*, *atp-6*, *ctc-2*, *ctc-3*, *ctc-1*, which we noticed were usually found together as the most upregulated genes in clusters that did not specifically express any known markers for *C. elegans* cell-types. This removed a total of 30,980 cells (31%). For the remaining 69,020 cells, raw counts were processed using the R package *SoupX* to reduce ambient RNA contamination <sup>39</sup>. We then normalized, reduced dimensions and clustered the background corrected cell profiles in *Monocle* using the same parameters as above.

To annotate cell-types, we used the markers described in a previous study (Table S12 in Ref <sup>18</sup>) that reanalyzed a previous L2 single-cell dataset <sup>17</sup>. Our cell-type annotation corresponds to the “UMAP” column in that table, with the following exceptions: (a) we separated hypodermis from seam cells, somatic gonad from sex muscle cells, and glia from excretory cells, since those groups were not clustering together in our data. (b) cells identified as “Miscellaneous” in that table were annotated as individual cell-type identifications in our data, with the exception of the sphincter and anal muscles which were not differentiated from each other in our data. Finally, we re-evaluated our cell type identifications, and filtered cell doublets as well as dead cell or debris that may still contaminate *bona fide* cell-type clusters. We trained a classifier using our

manually curated cell-type classifications with a L2-penalized multinomial logistic regression framework, as implemented in the *Scikit-learn* Python package (v0.22)<sup>40</sup>. We read the raw gene expression matrices into python using *scanpy* (v1.4.2). We removed 2,582 genes that were expressed in less than 10 cells. The gene expression levels of each cell were corrected so that the total gene expression counts added up to 10,000. Per gene, these corrected counts were normalized using a  $\log(1+x)$  transformation. To speed up the computation of the multinomial logistic regression, we only used the 2,037 genes with a mean expression between 0.0125 and 3, and a minimum dispersion of 0.5. We scaled the gene expression matrix so that the expression level of each gene across cells had a mean of 0 and a variance of 1, after scaling expression values over 20 were set to 20. We fit a multinomial logistic regression model using the scaled gene expression values for the 2,037 highly variable genes from the complete set of 69,020 cells to obtain an estimate for the inverse regularization strength (C). Using the estimated C of  $7.74 \times 10^{-04}$ , we performed 5 fold cross validation to estimate the probability that each cell belongs to one of the manually curated cell-type classifications. Any cell with a probability higher than 0.2 of belonging to 2 or more cell types (9,198) was classified as a doublet. Any cell which did not belong to a cell-type with probability  $\geq 0.4$  (5,547) was classified as low quality. In total, we removed 11,398 cells that were classified as a doublet or low quality. We removed an additional 2,114 cells classified as Neurons as described in the section “Neuronal cell-type classification”. For the remaining final list of 55,508 cells, we used the output of the classifier as the final cell-type classification. The final classification is shown in Figure 1. For display purposes the plot in Figure 1 was generated by rerunning *umap* on the finalized dataset with *euclidean* distance metric and *umap.min\_dist*=0.5, resulting in a more compressed visualization of the dataset.

## Estimating the number of unique genotypes

We note that calculating the number of expected unique genotypes is akin to the well-known “Birthday problem” in statistics. Given  $C$  cells sampled from  $I$  individuals, the expected number of cells with a unique genotype is  $C(1-1/I)^{C-1}$ . Assuming 50%-90% of worms were successfully dissociated (a conservative range), we expect 31,134-40,257 unique genotypes.

## Single-nucleotide variant counting

We used a list of single-nucleotide variants (SNVs) we previously curated for CB4856 compared to the N2 reference<sup>12</sup>. We derived genotype informative UMI counts for N2 and CB4856 variants using *Vartrix version 1.0* (<https://github.com/10XGenomics/vartrix>) directly on the output of *CellRanger*. To reduce SNV counts that result from SNVs in the ambient RNA background, we only kept SNVs that resided in genes with positive counts in the background corrected matrix.

## Genotype inference using a hidden Markov model

We set up a hidden Markov model (HMM) to infer the genotypes of the recombinant progeny<sup>41,42</sup>. The HMM is used to calculate the probability of underlying genotypes for each individual and requires three components: (1) prior probabilities for each of the possible genotypes, (2) emission probabilities for observing variant informative reads given each of the possible genotypes, (3) and transition probabilities - the probabilities of recombination occurring between adjacent genotype informative sites.

For the autosomal chromosomes we defined prior genotype probabilities as 0.25 for homozygote N2, 0.5 for heterozygote CB4856/N2, and 0.25 for homozygote CB4856. For the

sex chromosome we defined prior genotype probabilities as 0.44 for homozygotes N2, 0.44 for the heterozygote CB4856/N2, and 0.11 for homozygote CB4856. These values were chosen because to generate the segregant population, N2 hermaphrodites were crossed to CB4856 males, and thus contributed twice as many X chromosomes to the progeny as CB4856.

Emission probabilities were calculated as previously described for low coverage sequencing data<sup>43,44</sup> under the assumption that the observed counts of reads for both possible variants (Y) at a genotype informative site (g) arise from a random binomial sampling of the alleles present at that site and that sequencing errors (e) occur independently between reads at a rate of 0.002:

$$p(Y|g = NN) = \binom{D}{r}(1-e)^r(1-(1-e))^{D-r}$$

$$p(Y|g = NC) = \binom{D}{r}\frac{1}{2}^D$$

$$p(Y|g = CC) = \binom{D}{r}(e)^r(1-e)^{D-r}$$

Where (D) is the total read depth at a genotype informative site for a given individual, (r) is the total read depth for the N2 variant at that site, and N represents the N2 variant and C represents the CB4856 variant.

Transition probabilities were derived from an existing N2 x CB4856 genetic map<sup>45</sup>. We linearly interpolated genetic map distances from the existing map to all genotype informative sites in our cross progeny. We scaled these genetic map distances, multiplying them by a factor of 0.4, to account for the fact that the previous genetic map was built using ten generations of intercrossing whereas progeny from our cross are derived from four generations of intercrossing

<sup>46</sup>

For QTL mapping we used an additive coding, summing the probability that the genotype was homozygote CB4856 with one half the probability that the genotype was heterozygote N2/CB4856.

### eQTL mapping

Genotype probabilities were standardized, and markers in very high LD ( $r > .9999$ ) were pruned. This LD pruning is approximately equivalent to using markers spaced 5 centimorgans (cm) apart. For each transcript, we counted the number of cells for which at least one UMI count was detected in each cell type. Transcripts with non-zero counts in at least 20 cells in a cell type were considered expressed in that cell type and used for downstream analyses.

As has been previously described for droplet scRNA-seq, counts of UMIs can be adequately parameterized by a gamma-poisson distribution, which is also known as the negative binomial distribution <sup>47</sup>. Thus we used a negative binomial regression framework for eQTL mapping here. We also note that simpler approaches using  $\log(\text{counts}+1)$  with ordinary least squares behave pathologically, especially in regard to behavior with multiple partially correlated covariates, and simulations (not shown) showed such models lead to inflated false positive rates.

For each expressed transcript in each cell type we first fit the negative binomial generalized linear model:

$$E[Y] = \mu \quad (1)$$

$$\text{Var}(Y) = \mu + \frac{1}{\theta} \mu^2 \quad (2)$$

$$\mu = \text{exp}(\beta_i + X_t \beta_t + \mathbf{X}_b \beta_b + X_c \beta_c) \quad (3)$$

Which has the following log-likelihood:

$$\ell(\beta, \theta) = - \sum_{n=1}^N [(y_n + \theta) \log(\mu_n + \theta) - y_n \log(\mu_n) + \log(\Gamma(y_n + 1)) - \theta \log(\theta) + \log(\Gamma(\theta)) - \log(\Gamma(\theta + y_n))] \quad (4)$$

And where  $Y$  is a vector of UMI counts per cell,  $X_t$  is a vector of the log(total UMIs per cell) and controls for compositional effects,  $X_b$  is an indicator matrix assigning cells to batches, and  $X_c$  is the vector of standardized genotype probabilities across cells for the closest genotypic marker to each transcript from the pruned marker set. In addition,  $\beta$  is a vector of estimated coefficients from the model,  $\mu_n$  is the expected value of  $Y$  for a given cell  $n$ ,  $N$  is the total number of cells in the given cell type, and  $\theta$  is a negative binomial overdispersion parameter. Model parameters were estimated using iteratively-reweighted least squares as implemented in the *negbin.reg* function in the *Rfast2* R package. If the model did not converge, model parameters were estimated with the *gam* function in the *mgcv* package<sup>48</sup>, which opts for certainty of convergence over speed. We note that due to the computational burden of fitting so many GLMs in the context of sc-eQTL mapping, we chose to estimate  $\theta$  once for each transcript in each cell type for this model, and use that estimate of  $\theta$  in the additional models for that transcript within the cell type, as described below. This approach is conservative, as the effects of unmodeled factors (for example *trans* eQTLs) will be absorbed into the estimate of overdispersion, resulting in larger estimated overdispersion  $\left(\frac{1}{\theta}\right)$  and lower model likelihoods. Computational approaches that re-estimate  $\theta$  for each model, that jointly model all additive genetic effects, or that regularize  $\theta$  across models and transcripts<sup>49</sup>, may further increase statistical power to identify linkages.



To evaluate the statistical significance of *cis* eQTLs, a likelihood ratio statistic  $-2(\ell_{nc} - \ell_{fc})$ , was calculated comparing the log-likelihood of this model described above ( $\ell_{fc}$ ) to the log-likelihood of the model where  $\beta$  is re-estimated while leaving out the covariate  $X_c$  for the *cis* eQTL marker ( $\ell_{nc}$ ). A p-value was derived under the assumption that this statistic is  $\chi^2$  distributed with one degree of freedom. This p-value was used for the evaluation of significance of *cis* eQTLs for the neuronal subtypes. Within each neuronal subtype, FDR adjusted p-values were calculated using the method of Benjamini and Hochberg<sup>50</sup>. For the other cell types (with typically much larger cell numbers) and for the genome-wide scans for eQTLs, a permutation procedure was used to calculate FDR adjusted p-values, and is described further below.

For each expressed transcript in each cell type we also scanned the entire genome for eQTLs, enabling detection of *trans* eQTLs. A similar procedure was used as for *cis* eQTL except that equation (3) was replaced with:

$$\mu = \exp(\beta_i + X_t\beta_t + \mathbf{X}_b\beta_b + X_g\beta_g) \quad (5)$$

where  $X_g$  is a vector of the scaled genotype probabilities at the  $g$ th genotypic marker, and the model is fit separately, one at a time, for each marker across the genome for each transcript. A likelihood ratio statistic for each transcript, within each cell type, for each genotypic marker is calculated by comparing this model to the model where  $\beta$  is re-estimated while leaving out the covariate  $X_g$ . The likelihood ratio statistic was transformed into a LOD score, by dividing it by  $2\log_e(10)$ . We also used functions in the *fastglm* R package for this scan, again re-using estimates of  $\theta$  obtained as described above for each transcript for each cell type. For each transcript and each chromosome, QTL peak markers were identified as the marker with the

highest LOD score. The 1.5 LOD-drop procedure was used to define approximate 95% confidence intervals for QTL peaks <sup>51</sup>.

FDR-adjusted p-values were calculated for QTL peaks. They were calculated as the ratio of the number of transcripts expected by chance to show a maximum LOD score greater than a particular LOD threshold vs. the number of transcripts observed in the real data with a maximum LOD score greater than that threshold, for a series of LOD thresholds ranging from 0.1 to 0.1+the maximum observed LOD for all transcripts within a cell type, with equal-sized steps of 0.01. Per chromosome, the number of transcripts expected by chance at a given threshold was calculated by permuting the assignments of segregant identity within each batch relative to segregant genotypes, calculating LOD scores for all transcripts across the chromosome as described above, and recording the maximum LOD score for each transcript. In each permutation instance, the permutation ordering was the same across all transcripts. We repeated this permutation procedure 10 times. Then, for each of the LOD thresholds, we calculated the average number of transcripts with maximum LOD greater than the given threshold across the 10 permutations. We used the *approxfun* function in R to interpolate the mapping between LOD thresholds and FDR and estimate an FDR-adjusted p-value for each QTL peak <sup>52</sup>.

The same procedure was performed for *cis* eQTL analysis, with the difference being that the expected and observed number of transcripts at a given LOD threshold were calculated only at the marker closest to the transcript. We note that, as expected, Benjamini and Hochberg adjusted p-values, and FDR adjusted p-values from this permutation procedure for *cis* eQTLs were nearly identical.

## **scRNA-seq in the parental strains**

The parental QX2314 and PTM299 strains were grown separately for 4 generations on 10cm plates, with recurrent cycles of bleaching and synchronization as was done for the segregant population. For single cell preparation, synchronized L1 from both strains were seeded together in equal numbers on 10cm plates, and they were processed together from that point onwards, to limit any environmental effects. We believe that differences in efficiency of the cell preparation procedure between N2 and CB4856 could explain the imbalanced representation in the final dataset (6,721 N2 and 3,104 CB4856 cells). We took advantage of the different parental genotypes when processing the cells, and called cells as those with at least 50 SNV counts supporting one genotype, and less than 50 supporting the other. Cell-type identification was automated by using the logistic regression model trained on the segregants which is discussed above. Differential expression analysis was carried out using the *DEsingle* R package in each cell type, as well as globally in all cells combined<sup>53</sup>.

To compare differential expression results with our *cis* eQTL results, we first normalized the effect size of each *cis* eQTL by its standard error. Those were used directly in comparisons done within each cell type. To compare with global differential expression, those standardized effects were combined across all cell types in which an eQTL was identified using Stouffer's weighted-Z method<sup>54</sup>.

### **Processing whole-worm eQTL data**

Microarray genotype and gene expression data for our published expression QTL data were acquired from the gene expression omnibus (GEO)<sup>20</sup>. Probe sequences were realigned to the WBcel235 transcriptome using BWA, and uniquely mapping probes were used. Expression probes that were present in less than 2/3 of the sample were removed. The genotype and

expression matrices were standardized. To map eQTLs, we calculated the Pearson correlation between each probe and every genotype. Correlation coefficients were transformed to LOD scores using  $-n \cdot \frac{\ln(1 - R^2)}{2\ln(10)}$ . To assess significance and account for multiple testing, we permuted the sample identities 100 times and calculated the average number of transcripts with an identified eQTL at different LOD scores. We compared these results to the unpermuted LOD scores to estimate the false-discovery rate (FDR)<sup>58</sup>, and selected a cutoff corresponding to a rate of 10% (LOD = 4.2), equivalent to the single-cell mapping. *cis* eQTLs were derived by calculating the Pearson correlation between transcript expression and the normalized genotypes in the variant nearest to a given transcript, transforming to LOD score and comparing against the global threshold.

### Hotspot analysis

To discover hotspots, we split the genome into 130 bins of 5 centimorgans each. We then counted the number of eQTLs in each bin identified in each cell type (applying a 10% FDR significance threshold), after removing all *cis* linkages. *Cis* linkages were defined here as those where the transcribed gene falls within the 95% eQTL confidence-interval range extended by 1MB on both sides. A bin was considered to have an excess of linkages if the number of linkages exceeded the number expected by chance from a Poisson distribution, given the average number of linkages per bin for that cell type and a Bonferroni correction for the total number of bins ( $p < 3.8e-4$ )<sup>55</sup>. The *findpeaks* function in the *pracma* R package was used to identify peak hotspot bins and prevent identifying sets of adjacent bins as hotspots.

For gene ontology (GO) analysis, we identified hotspot targets using the same procedure above, but relaxed the significance threshold to 20% FDR. We then used the R package *topGO* to identify enriched terms, with the genes expressed in the cell type used as background.

### **Neuronal cell-type classification**

Neuronal classification was carried out using a combination of available *C. elegans* scRNA-seq datasets, including a published L2 dataset<sup>17,18</sup>, and the *C. elegans* Neuronal Gene Expression Map & Network (CeNGEN) project<sup>28</sup>. Neuronal cells were processed separately using *monocle3* with default parameters, with the exception that 100 dimensions were specified for the *preprocess\_cds* step. The analysis was carried out in two passes. In the first pass, we processed all cells identified by our classifier as neurons. Following Leiden clustering, we removed 2,114 cells that were in clusters whose top genes were mostly mitochondrial and ribosomal genes, similar to the analysis described above for the global dataset. We then processed the pruned dataset in *monocle3* as described above. To annotate the final neuronal clusters, we first used the list of marker genes from two previous publications<sup>18,27</sup>, to derive candidate clusters that uniquely express marker genes. We next used the *top\_markers* function in *monocle3* to identify upregulated genes in each cluster compared to the rest. These were compared with the data available in the online SCeNGEN *Shiny* application (<https://cengen.shinyapps.io/SCeNGEA>) for the candidate cluster. The full list of genes used for classification is found in Table S5. In the final dataset, clusters Unknown\_1 - Unknown\_4 are of unknown identity and do not correspond to the clusters of the same name in CeNGEN, while the clusters Unknown\_touch and Unknown\_glut\_2 do correspond to cell clusters of the same names in CeNGEN.

## Single neuronal subtype eQTL (sn-eQTL) analysis

sn-eQTL mapping is described above (section “eQTL mapping”). GO annotation of genes with sn-eQTL was done in *topGO*, with the genes expressed in neurons (determined using the criteria for inclusion in eQTL mapping) used as background. A heatmap was plotted using the *ComplexHeatmap* package<sup>56</sup>. To determine the consistency in effect direction between the sn-eQTL neuron and the rest of the neurons, we repeated the eQTL mapping, aggregating cells from all neuronal cell-types but omitting the neuron with the sn-eQTL. The RIC and RIM neurons in the parental datasets were identified using the same gene markers used in the segregant eQTL dataset, as described in Table S5.

## Supplementary Figures

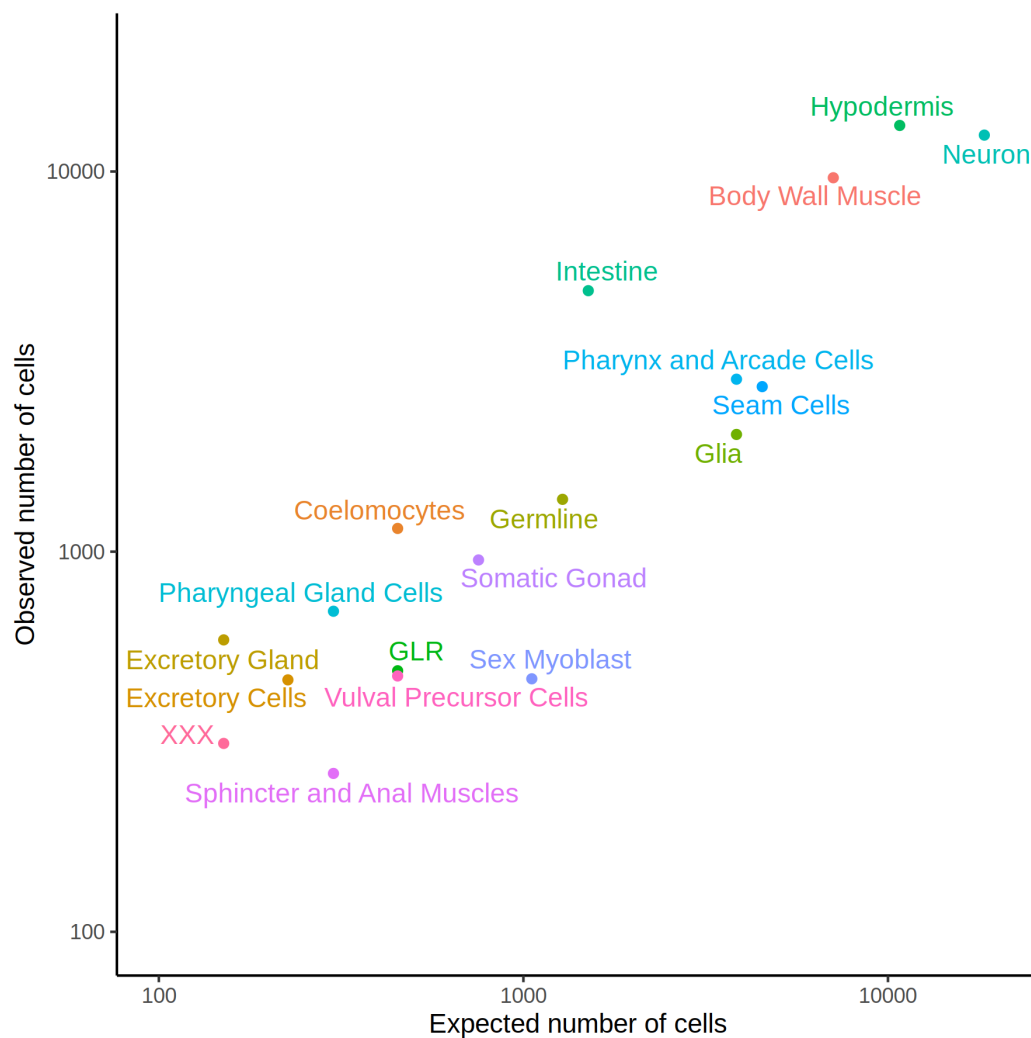

**Figure S1. Observed representation of cell-types in our dataset compared to expected.**

The expected number of cells was calculated by manually curating the cellular lineage information available at <https://www.wormatlas.org/> for the L2 stage.

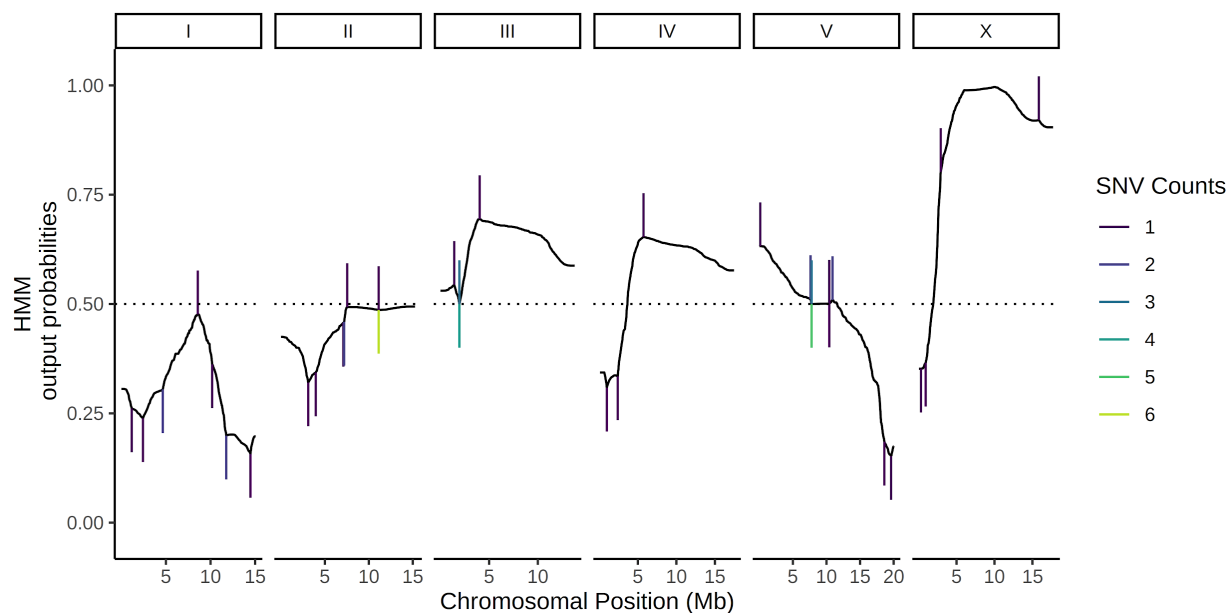

**Figure S2. Probabilistic genotyping using a hidden markov model (HMM).** A cell with the median (69) number of unique genotype-informative SNV UMI counts is shown for illustration. The trace is a summation of the probability of a CB4856 homozygous genotype and half the probability of CB4856 heterozygous genotype at each position. Each vertical line is a count for an SNV, and colors correspond to the count depth. Vertical lines pointing upwards denote counts supporting the CB4856 variant, while lines pointing downwards are counts supporting the N2 variant.



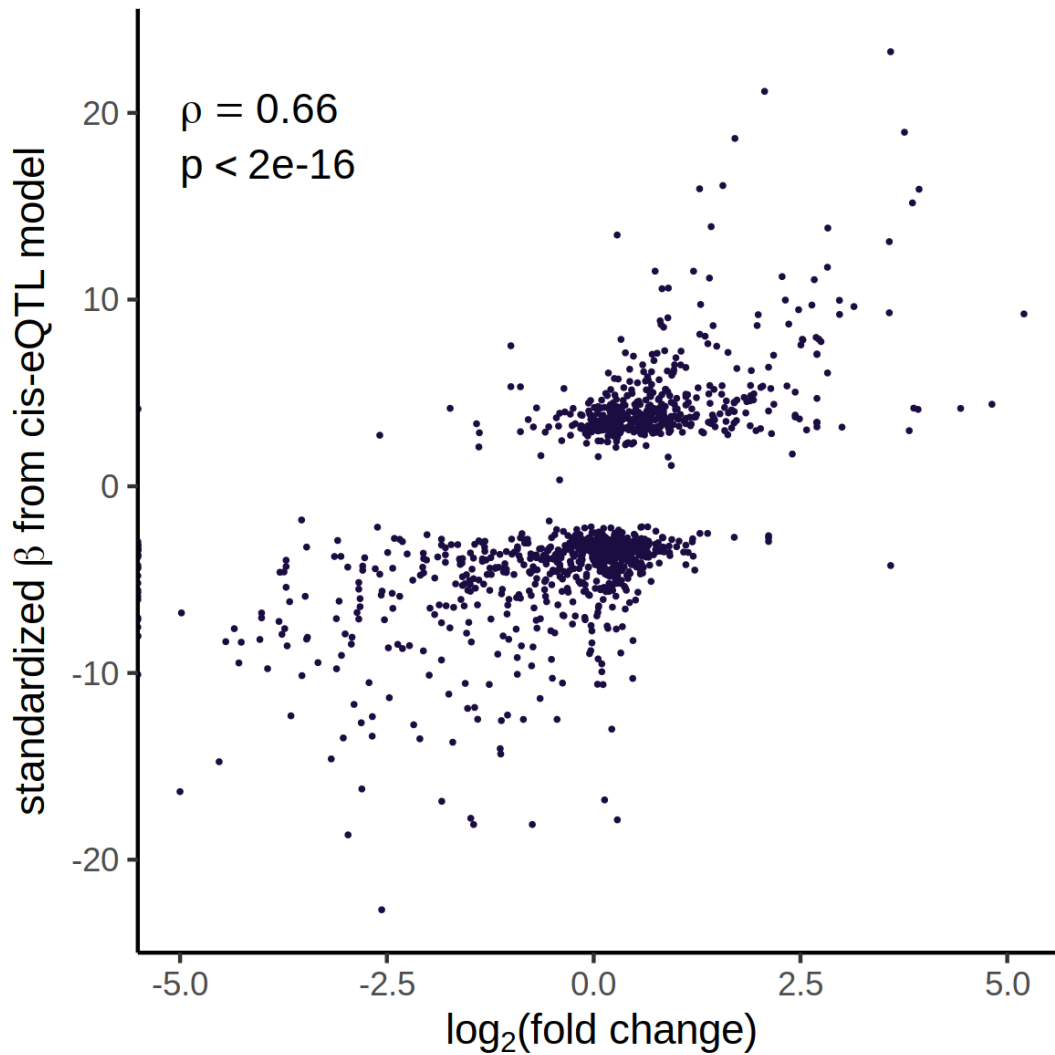

**Figure S3. *cis* eQTLs reflect gene expression differences in the parent strains.**

Comparison between *cis* eQTLs mapped across all cell types and gene expression differences in a dataset of 6,721 N2 and 3,104 CB4856 cells. For *cis* eQTLs mapped in multiple cell-types, effect sizes were combined using Stouffer's weighted-Z method<sup>54</sup>. Differential gene expression between N2 and CB4856 was calculated using R package DEsingle<sup>53</sup>.

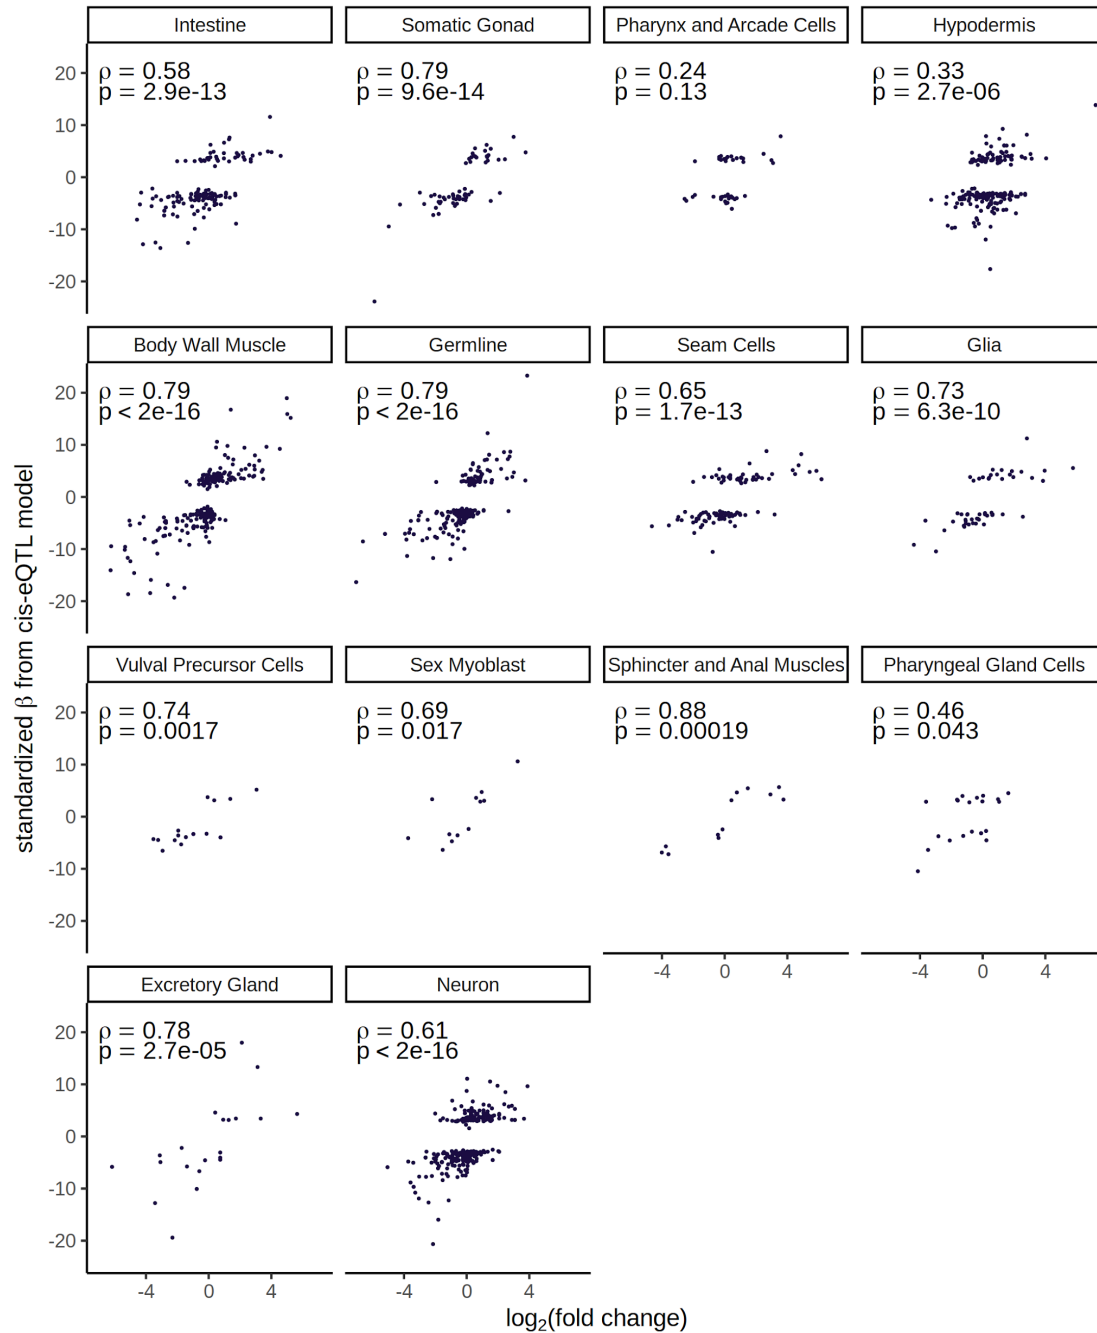

**Figure S4. Correlation between cell-type *cis*-eQTL signal and differential gene expression between the parental strains.** The data corresponds to Figure S3, split out by each cell type separately.

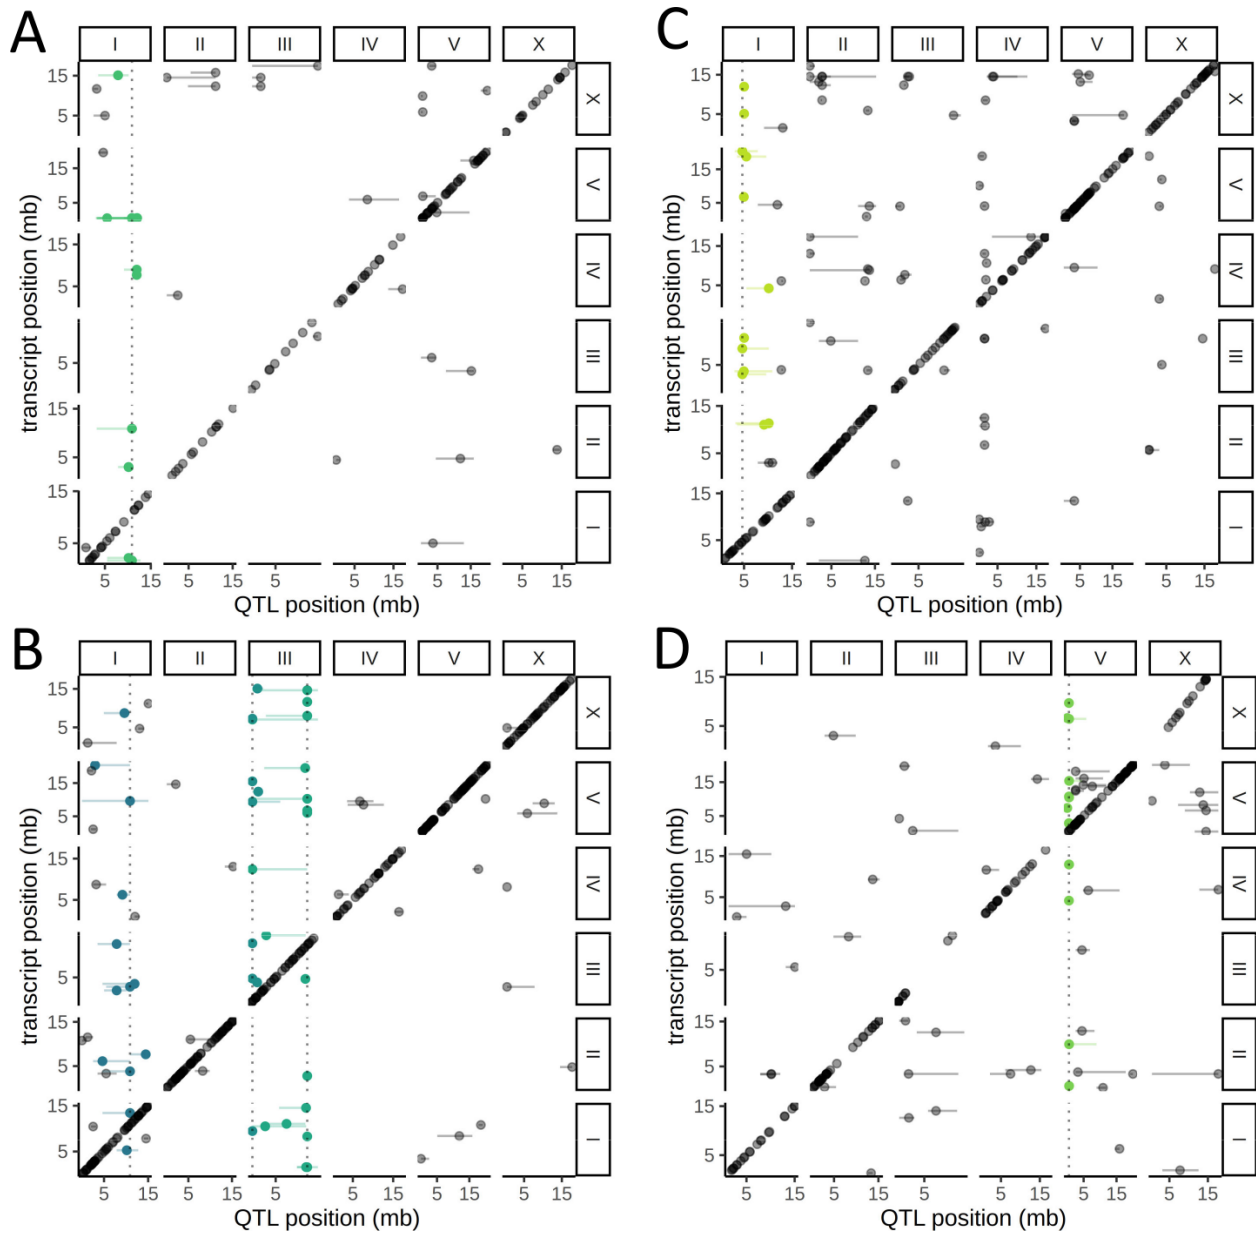

**Figure S5. cell-type-specific *trans*-eQTL Hotspots.** A genome-wide map of eQTLs in seam cells (A), neurons (B), body-wall muscle cells (C) and intestinal cells (D) is shown. The position of the eQTLs is shown on the x-axis, while the y-axis shows the position of the associated transcripts. The dotted line marks the peak position of the hotspot, while targets of each hotspot are colored.

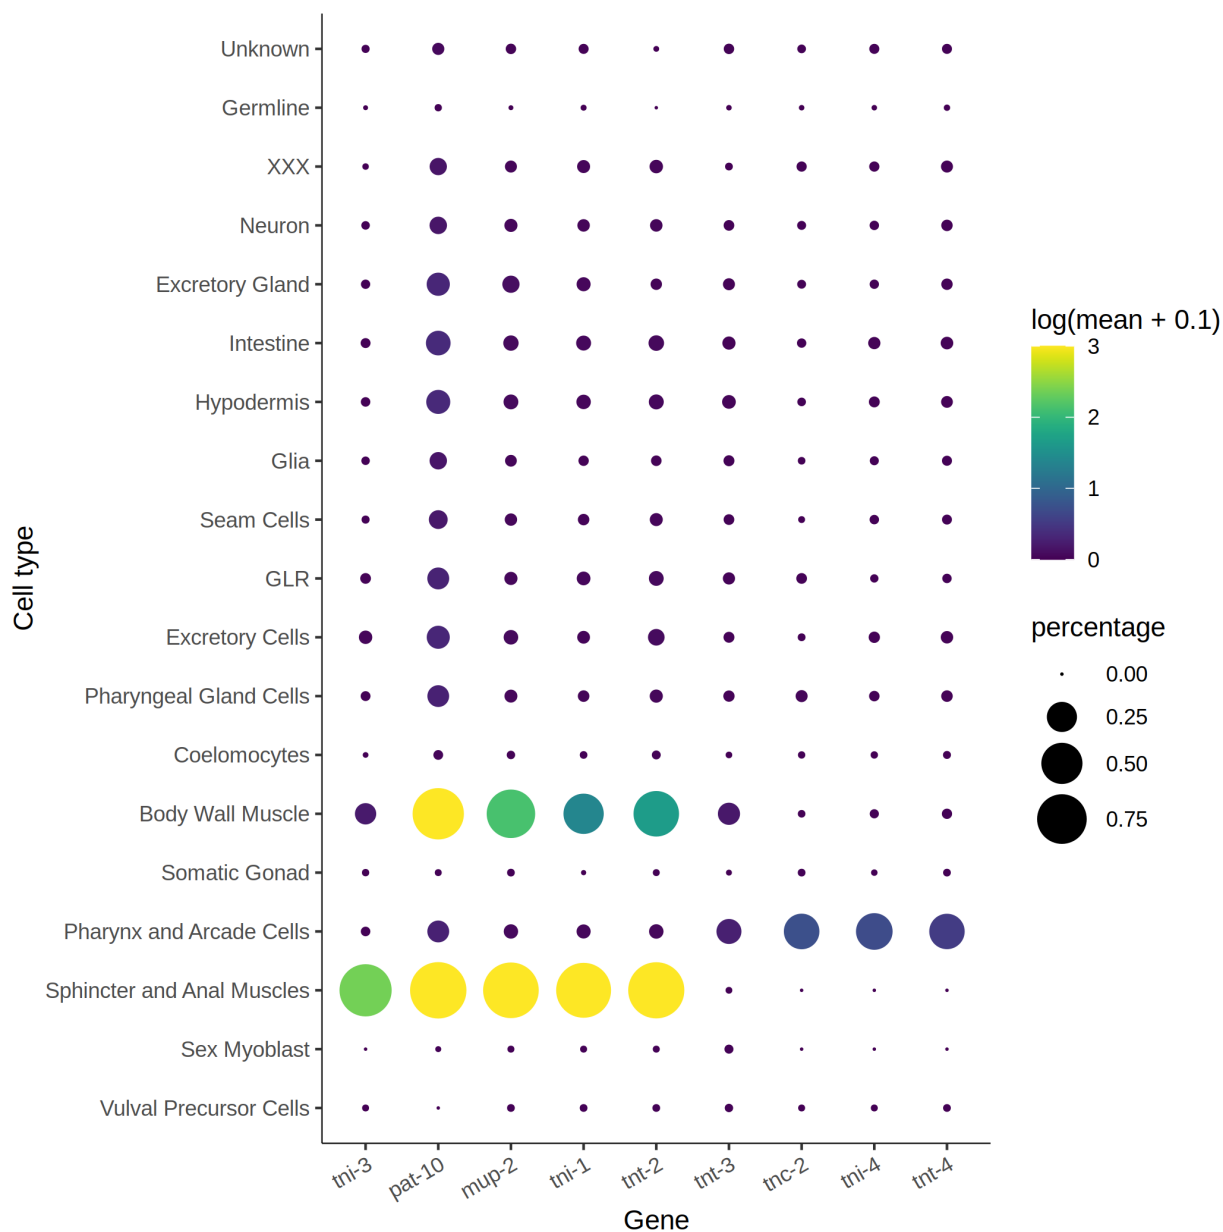

**Figure S6. Cell-type expression of genes that form troponin complexes.** Size of circles corresponds to the percentage of cells expressing each gene in each cell-type, and the color corresponds to average log(counts + 1). Of the four troponin genes strongly expressed in the body wall muscle, three are affected by a *trans*-eQTL hotspot on Chr. I.



## References

1. Albert, F. W. & Kruglyak, L. The role of regulatory variation in complex traits and disease. *Nat. Rev. Genet.* **16**, 197–212 (2015).
2. Hormozdiari, F. *et al.* Leveraging molecular quantitative trait loci to understand the genetic architecture of diseases and complex traits. *Nat. Genet.* **50**, 1041–1047 (2018).
3. Gusev, A. *et al.* Partitioning heritability of regulatory and cell-type-specific variants across 11 common diseases. *Am. J. Hum. Genet.* **95**, 535–552 (2014).
4. Raj, T. *et al.* Polarization of the Effects of Autoimmune and Neurodegenerative Risk Alleles in Leukocytes. *Science* **344**, 519–523 (2014).
5. Fairfax, B. P. *et al.* Genetics of gene expression in primary immune cells identifies cell type-specific master regulators and roles of HLA alleles. *Nat. Genet.* **44**, 502–510 (2012).
6. Ishigaki, K. *et al.* Polygenic burdens on cell-specific pathways underlie the risk of rheumatoid arthritis. *Nat. Genet.* **49**, 1120–1125 (2017).
7. Donovan, M. K. R., D’Antonio-Chronowska, A., D’Antonio, M. & Frazer, K. A. Cellular deconvolution of GTEx tissues powers discovery of disease and cell-type associated regulatory variants. *Nat. Commun.* **11**, 955 (2020).
8. Kim-Hellmuth, S. *et al.* Cell type specific genetic regulation of gene expression across human tissues. *bioRxiv* 806117 (2019) doi:10.1101/806117.
9. van der Wijst, M. G. P. *et al.* Single-cell RNA sequencing identifies celltype-specific cis-eQTLs and co-expression QTLs. *Nat. Genet.* **50**, 493–497 (2018).
10. Sarkar, A. K. *et al.* Discovery and characterization of variance QTLs in human induced pluripotent stem cells. *PLOS Genet.* **15**, e1008045 (2019).
11. Cuomo, A. S. E. *et al.* Single-cell RNA-sequencing of differentiating iPS cells reveals dynamic genetic effects on gene expression. *Nat. Commun.* **11**, 1–14 (2020).
12. Burga, A., Ben-David, E., Vergara, T. L., Boocock, J. & Kruglyak, L. Fast genetic mapping of complex traits in *C. elegans* using millions of individuals in bulk. *Nat. Commun.* **10**, 2680 (2019).

13. Hall, D. H. & Altun, Z. F. C. *C. elegans atlas*. (Cold Spring Harbor Laboratory Press, 2007).
14. McInnes, L., Healy, J. & Melville, J. UMAP: Uniform Manifold Approximation and Projection for Dimension Reduction. *ArXiv180203426 Cs Stat* (2018).
15. Traag, V. A., Waltman, L. & van Eck, N. J. From Louvain to Leiden: guaranteeing well-connected communities. *Sci. Rep.* **9**, 1–12 (2019).
16. Trapnell, C. *et al.* The dynamics and regulators of cell fate decisions are revealed by pseudotemporal ordering of single cells. *Nat. Biotechnol.* **32**, 381–386 (2014).
17. Cao, J. *et al.* Comprehensive single-cell transcriptional profiling of a multicellular organism. *Science* **357**, 661–667 (2017).
18. Packer, J. S. *et al.* A lineage-resolved molecular atlas of *C. elegans* embryogenesis at single-cell resolution. *Science* **365**, (2019).
19. Mandric, I. *et al.* Optimal design of single-cell RNA sequencing experiments for cell-type-specific eQTL analysis. *bioRxiv* 766972 (2019) doi:10.1101/766972.
20. Rockman, M. V., Skrovaneck, S. S. & Kruglyak, L. Selection at linked sites shapes heritable phenotypic variation in *C. elegans*. *Science* **330**, 372–376 (2010).
21. Pukkila-Worley, R. & Ausubel, F. M. Immune defense mechanisms in the *Caenorhabditis elegans* intestinal epithelium. *Curr. Opin. Immunol.* **24**, 3–9 (2012).
22. Ono, K. & Ono, S. Tropomyosin and Troponin Are Required for Ovarian Contraction in the *Caenorhabditis elegans* Reproductive System. *Mol. Biol. Cell* **15**, 2782–2793 (2004).
23. Gumienny, T. L. TGF- $\beta$  signaling in *C. elegans*. *WormBook* 1–34 (2013) doi:10.1895/wormbook.1.22.2.
24. Suzuki, Y. *et al.* A BMP homolog acts as a dose-dependent regulator of body size and male tail patterning in *Caenorhabditis elegans*. *Dev. Camb. Engl.* **126**, 241–250 (1999).
25. Andersen, E. C. *et al.* A Powerful New Quantitative Genetics Platform, Combining *Caenorhabditis elegans* High-Throughput Fitness Assays with a Large Collection of Recombinant Strains. *G3 Genes Genomes Genet.* **5**, 911–920 (2015).

26. Hobert, O., Glenwinkel, L. & White, J. Revisiting Neuronal Cell Type Classification in *Caenorhabditis elegans*. *Curr. Biol. CB* **26**, R1197–R1203 (2016).
27. Hammarlund, M., Hobert, O., Miller, D. M. & Sestan, N. The CeNGEN Project: The Complete Gene Expression Map of an Entire Nervous System. *Neuron* **99**, 430–433 (2018).
28. Taylor, S. R. *et al.* Expression profiling of the mature *C. elegans* nervous system by single-cell RNA-Sequencing. *bioRxiv* 737577 (2019) doi:10.1101/737577.
29. Portman, D. S. & Emmons, S. W. Identification of *C. elegans* sensory ray genes using whole-genome expression profiling. *Dev. Biol.* **270**, 499–512 (2004).
30. Francesconi, M. & Lehner, B. The effects of genetic variation on gene expression dynamics during development. *Nature* **505**, 208–211 (2014).
31. Yao, C. *et al.* Dynamic Role of trans Regulation of Gene Expression in Relation to Complex Traits. *Am. J. Hum. Genet.* **100**, 571–580 (2017).
32. Kolberg, L., Kerimov, N., Peterson, H. & Alasoo, K. Co-expression analysis reveals interpretable gene modules controlled by trans-acting genetic variants. *bioRxiv* 2020.04.22.055335 (2020) doi:10.1101/2020.04.22.055335.
33. Brynedal, B. *et al.* Large-Scale trans-eQTLs Affect Hundreds of Transcripts and Mediate Patterns of Transcriptional Co-regulation. *Am. J. Hum. Genet.* **100**, 581–591 (2017).
34. Smith, E. N. & Kruglyak, L. Gene–Environment Interaction in Yeast Gene Expression. *PLOS Biol.* **6**, e83 (2008).
35. Aguet, F. *et al.* The GTEx Consortium atlas of genetic regulatory effects across human tissues. *bioRxiv* 787903 (2019) doi:10.1101/787903.
36. Zhang, S., Banerjee, D. & Kuhn, J. R. Isolation and Culture of Larval Cells from *C. elegans*. *PLOS ONE* **6**, e19505 (2011).
37. Kaletsky, R. *et al.* The *C. elegans* adult neuronal IIS/FOXO transcriptome reveals adult phenotype regulators. *Nature* **529**, 92–96 (2016).



38. Qiu, X. *et al.* Single-cell mRNA quantification and differential analysis with Census. *Nat. Methods* **14**, 309–315 (2017).
39. Young, M. D. & Behjati, S. SoupX removes ambient RNA contamination from droplet based single-cell RNA sequencing data. *bioRxiv* 303727 (2020) doi:10.1101/303727.
40. Pedregosa, F. *et al.* Scikit-learn: Machine Learning in Python. *J. Mach. Learn. Res.* **12**, 2825–2830 (2011).
41. Broman, K. W. The Genomes of Recombinant Inbred Lines. *Genetics* **169**, 1133–1146 (2005).
42. Arends, D., Prins, P., Jansen, R. C. & Broman, K. W. R/qtl: high-throughput multiple QTL mapping. *Bioinforma. Oxf. Engl.* **26**, 2990–2992 (2010).
43. Dodds, K. G. *et al.* Construction of relatedness matrices using genotyping-by-sequencing data. *BMC Genomics* **16**, 1047 (2015).
44. Bilton, T. P. *et al.* Accounting for Errors in Low Coverage High-Throughput Sequencing Data When Constructing Genetic Maps Using Biparental Outcrossed Populations. *Genetics* **209**, 65–76 (2018).
45. Rockman, M. V. & Kruglyak, L. Recombinational Landscape and Population Genomics of *Caenorhabditis elegans*. *PLOS Genet.* **5**, e1000419 (2009).
46. Rockman, M. V. & Kruglyak, L. Breeding Designs for Recombinant Inbred Advanced Intercross Lines. *Genetics* **179**, 1069–1078 (2008).
47. Svensson, V. Droplet scRNA-seq is not zero-inflated. *Nat Biotechnol* **38**, 147–150 (2020).
48. Wood, S. N. *Generalized Additive Models: An Introduction with R*. (Chapman and Hall/CRC, 2017).
49. McCarthy, D. J., Chen, Y. & Smyth, G. K. Differential expression analysis of multifactor RNA-Seq experiments with respect to biological variation. *Nucleic Acids Res* **40**, 4288–4297 (2012).
50. Benjamini, Y. & Hochberg, Y. Controlling the false discovery rate: a practical and powerful approach to multiple testing. *J R Stat Soc* (1995).
51. Dupuis, J. & Siegmund, D. Statistical methods for mapping quantitative trait loci from a dense set of markers. *Genetics* **151**, 373–386 (1999).

52. Albert, F. W., Bloom, J. S., Siegel, J., Day, L. & Kruglyak, L. Genetics of trans-regulatory variation in gene expression. *eLife* **7**, e35471 (2018).
53. Miao, Z., Deng, K., Wang, X. & Zhang, X. DEsingle for detecting three types of differential expression in single-cell RNA-seq data. *Bioinformatics* **34**, 3223–3224 (2018).
54. Whitlock, M. C. Combining probability from independent tests: the weighted Z-method is superior to Fisher’s approach. *J. Evol. Biol.* **18**, 1368–1373 (2005).
55. Smith, E. N. & Kruglyak, L. Gene–Environment Interaction in Yeast Gene Expression. *PLOS Biol.* **6**, e83 (2008).
56. Gu, Z., Eils, R. & Schlesner, M. Complex heatmaps reveal patterns and correlations in multidimensional genomic data. *Bioinforma. Oxf. Engl.* **32**, 2847–2849 (2016).
